# Supplementary material
Source: HighWire-hosted journal article supplement (https://bmjopensem.bmj.com/content/4/1/e000342)

**Appendix 1**


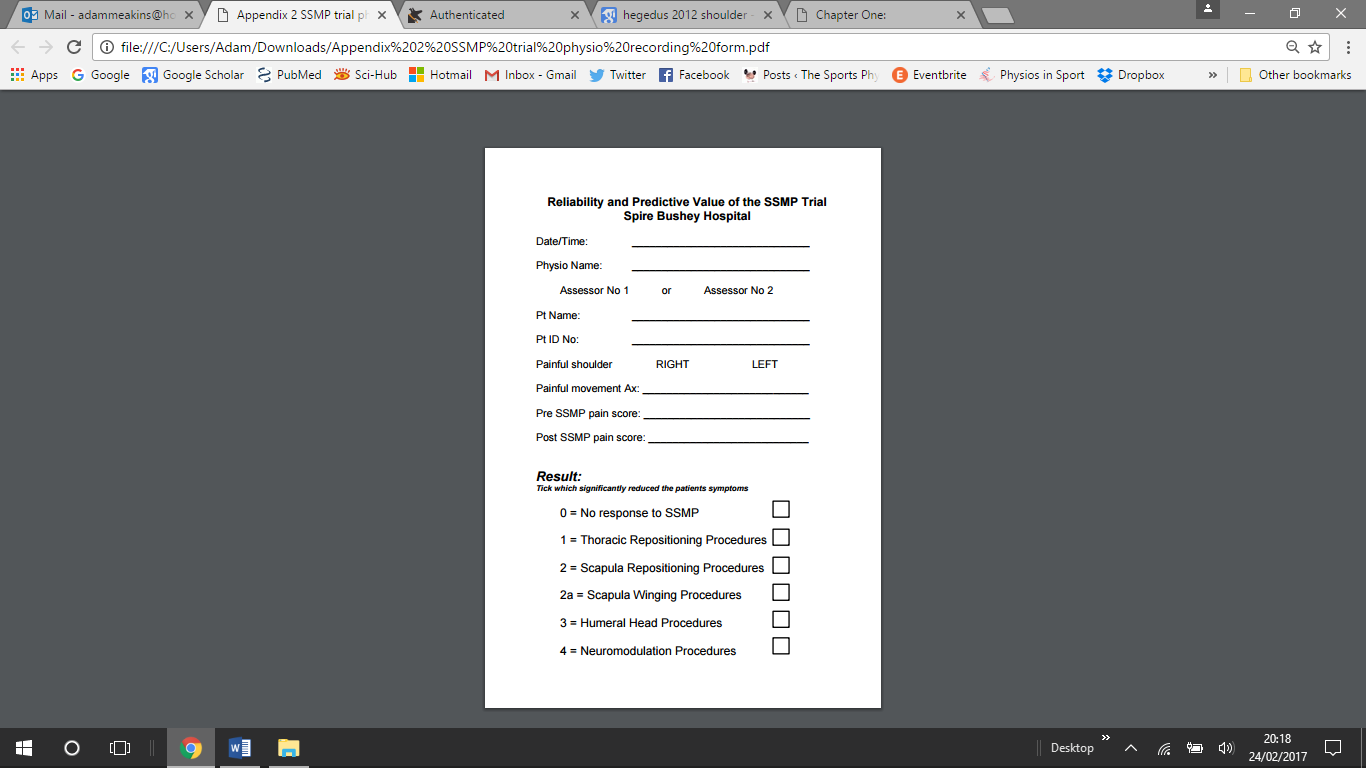

Supplement: inline-supplementary-material-1 [file inline-supplementary-material-1.docx]
